# Supplementary material for: Early detection of type 2 diabetes mellitus using machine learning-based prediction models
Source: PubMed Central journal article supplement (PMC7371679; doi:10.1038/s41598-020-68771-z), 2020-07-20
Supplement: 41598_2020_68771_MOESM1_ESM.pdf [file 41598_2020_68771_MOESM1_ESM.pdf]

*Supplementary information*

## **Early detection of type 2 diabetes mellitus using machine learning-based prediction models**

Leon Kopitar<sup>1,\*</sup>, Primož Kocbek<sup>2</sup>, Leona Cilar<sup>2</sup>, Aziz Sheikh<sup>4,5</sup>, and Gregor Štiglic<sup>2,3</sup>

<sup>1</sup>Faculty of Mathematics, Natural Sciences and Information Technologies, University of Primorska, Koper, 6000, Slovenia

<sup>2</sup>Faculty of Health Sciences, University of Maribor, Maribor, 2000, Slovenia

<sup>3</sup>Faculty of Electrical Engineering and Computer Science, University of Maribor, Maribor, 2000, Slovenia

<sup>4</sup>Centre for Medical Informatics, Usher Institute of Population Health Sciences and Informatics, University of Edinburgh, Edinburgh, EH8 9AG, Scotland, UK

<sup>5</sup>Division of General Internal Medicine and Primary Care, Brigham and Women's Hospital/Harvard Medical School, Boston, MA, 02115, USA

\*leon.kopitar@famnit.upr.si

| <b>T6</b>       |          | <b>lm</b> | <b>Glmnet</b> | <b>LightGBM</b> | <b>RF</b> | <b>XGBoost</b> |  |
|-----------------|----------|-----------|---------------|-----------------|-----------|----------------|--|
| <b>lm</b>       | 1        | 1.71E-08  | 1.71E-08      | 9.86E-06        | 2.43E-12  | <b>AUPRC</b>   |  |
| <b>Glmnet</b>   | 3.35E-01 | 1         | 1.15E-03      | 4.27E-02        | 1.98E-06  |                |  |
| <b>LightGBM</b> | 5.92E-05 | 4.91E-09  | 1             | 2.43E-01        | 1.07E-01  |                |  |
| <b>RF</b>       | 1.43E-01 | 3.78E-01  | 2.53E-20      | 1               | 6.49E-03  |                |  |
| <b>XGBoost</b>  | 1.64E-33 | 8.31E-44  | 6.55E-20      | 2.76E-44        | 1         |                |  |
| <b>AUC</b>      |          |           |               |                 |           |                |  |
| <b>T12</b>      |          | <b>lm</b> | <b>Glmnet</b> | <b>LightGBM</b> | <b>RF</b> | <b>XGBoost</b> |  |
| <b>lm</b>       | 1        | 9.37E-02  | 1.96E-08      | 6.63E-10        | 5.71E-20  | <b>AUPRC</b>   |  |
| <b>Glmnet</b>   | 8.70E-03 | 1         | 3.99E-04      | 4.85E-05        | 1.20E-11  |                |  |
| <b>LightGBM</b> | 4.35E-04 | 5.25E-11  | 1             | 5.77E-01        | 7.15E-04  |                |  |
| <b>RF</b>       | 4.66E-02 | 6.66E-08  | 1.11E-02      | 1               | 4.90E-03  |                |  |
| <b>XGBoost</b>  | 4.52E-66 | 9.75E-98  | 1.76E-51      | 3.38E-61        | 1         |                |  |
| <b>AUC</b>      |          |           |               |                 |           |                |  |
| <b>T18</b>      |          | <b>lm</b> | <b>Glmnet</b> | <b>LightGBM</b> | <b>RF</b> | <b>XGBoost</b> |  |
| <b>lm</b>       | 1        | 7.35E-01  | 4.17E-13      | 1.64E-05        | 3.68E-31  | <b>AUPRC</b>   |  |
| <b>Glmnet</b>   | 1.76E-18 | 1         | 1.14E-11      | 9.21E-05        | 1.15E-28  |                |  |
| <b>LightGBM</b> | 8.98E-14 | 1.67E-60  | 1             | 6.44E-03        | 3.03E-06  |                |  |
| <b>RF</b>       | 7.09E-02 | 1.74E-28  | 4.48E-20      | 1               | 7.68E-13  |                |  |
| <b>XGBoost</b>  | 1.86E-45 | 2.48E-109 | 2.01E-14      | 2.69E-41        | 1         |                |  |
| <b>AUC</b>      |          |           |               |                 |           |                |  |
| <b>T24</b>      |          | <b>lm</b> | <b>Glmnet</b> | <b>LightGBM</b> | <b>RF</b> | <b>XGBoost</b> |  |
| <b>lm</b>       | 1        | 1.95E-02  | 3.85E-13      | 5.81E-14        | 2.34E-26  | <b>AUPRC</b>   |  |
| <b>Glmnet</b>   | 7.33E-22 | 1         | 4.81E-06      | 1.82E-06        | 1.93E-14  |                |  |
| <b>LightGBM</b> | 2.55E-08 | 1.95E-50  | 1             | 8.79E-01        | 2.45E-03  |                |  |
| <b>RF</b>       | 1.08E-01 | 5.16E-32  | 7.05E-10      | 1               | 3.65E-03  |                |  |
| <b>XGBoost</b>  | 4.50E-24 | 2.70E-83  | 7.92E-07      | 1.34E-20        | 1         |                |  |
| <b>AUC</b>      |          |           |               |                 |           |                |  |
| <b>T30</b>      |          | <b>lm</b> | <b>Glmnet</b> | <b>LightGBM</b> | <b>RF</b> | <b>XGBoost</b> |  |
| <b>lm</b>       | 1        | 6.26E-03  | 3.07E-19      | 8.22E-19        | 3.85E-33  | <b>AUPRC</b>   |  |
| <b>Glmnet</b>   | 7.79E-23 | 1         | 2.85E-09      | 7.51E-09        | 2.61E-18  |                |  |
| <b>LightGBM</b> | 2.97E-21 | 6.58E-85  | 1             | 7.96E-01        | 8.45E-03  |                |  |
| <b>RF</b>       | 2.20E-03 | 6.04E-45  | 1.63E-22      | 1               | 3.24E-03  |                |  |
| <b>XGBoost</b>  | 2.53E-48 | 3.96E-133 | 3.09E-08      | 3.83E-38        | 1         |                |  |
| <b>AUC</b>      |          |           |               |                 |           |                |  |

**Supplementary Table S1:** Quantification of performance differences between models (AUC and AUPRC). Each cell corresponding to a pair of prediction models contains a p-value.
